# Supplementary material
Source: publisher site journal article supplement (https://www.spandidos-publications.com/2407/downloadSupplementary)

Figure S1. RNA expression levels of Lin28 in PTC according to GEO databases. (A) Elevated Lin28A expression in PTC tissues, as per the data retrieved from the GEO database. (B and C) In the GEO database, Lin28A and Lin28B expression levels in PTC tissues have association with minimal invasion of the extrathyroidal soft tissue and distant organ metastasis. PTC, papillary thyroid carcinoma; GEO, Gene Expression Omnibus.

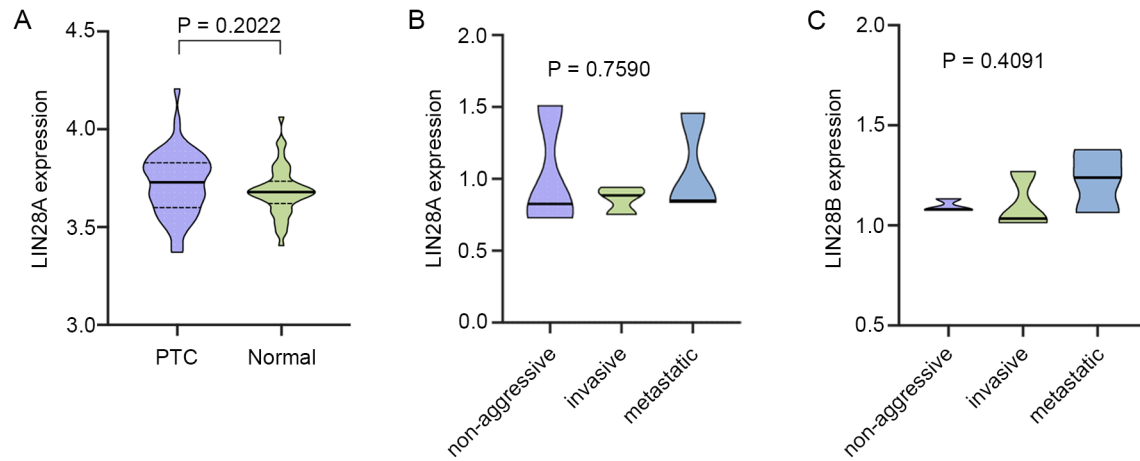

Supplement: Supplementary file 1 [file downloadSupplementary]
